# Supplementary material for: Effect of Dietary Soybean Oil Inclusion on Liver-Related Transcription Factors in a Pig Model for Metabolic Diseases
Source: Preprints.org preprint supplement (doi:10.20944/preprints202202.0149.v1), 2022-02-10
Supplement: Supplementary file 1 [file S4.xlsx]

## Sheet: Plan1
Table S4. Mechanisms and effects between transcription factors and DEG associated identified from the analysis networks (transcription factor) by MetaCore (Clarivate Analytics) [https://portal.genego.com/] from the list of differentially expressed genes of liver tissue of immunocastrated male pigs fed with two different soybean oil proportions in the diet (SOY1.5: 1.5 % and SOY3.0: 3.0 % of soybe…
From	To	Effect	Mechanism
ESR1 (nuclear)	CRY2	Transcription regulation	Inhibition
Beta-catenin	Tcf(Lef)	Complex formation	Activation
STAT3	TERT	Transcription regulation	Activation
GSK3 beta	GSK3 beta	Phosphorylation	Activation
STAT3	Rb protein	Transcription regulation	Activation
TCF8	KLF6	Transcription regulation	Activation
Androgen receptor	E2F1	Binding	Activation
ESR1 (nuclear)	RXRA	Transcription regulation	Inhibition
STAT3	TPX2	Transcription regulation	Activation
SMAD3	AKT1	Binding	Activation
Androgen receptor	ESR1 (nuclear)	Binding	Inhibition
HNF1-beta	TCF8	Transcription regulation	Activation
AKT1	SMAD3	Phosphorylation	Inhibition
Coumestrol intracellular	Coumestrol + H(,2)O + ATP = PO(,4)('3-) + Coumestrol + ADP	Technical	Technical
SOX9	CDK1 (p34)	Transcription regulation	Inhibition
Coumestrol intracellular	CDK6	Binding	Inhibition
HNF1-beta	Rb protein	Transcription regulation	Activation
KLF6	SREBP2 precursor	Transcription regulation	Activation
ATP cytoplasm	Coumestrol + H(,2)O + ATP = PO(,4)('3-) + Coumestrol + ADP	Technical	Technical
Androgen receptor	SMAD3	Binding	Inhibition
Beta-catenin	EGFR	co-regulation of transcription	Activation
H(,2)O + Rociletinib + ATP = PO(,4)('3-) + Rociletinib + ADP	Rociletinib extracellular region	Technical	Technical
ESR1 (nuclear)	CDK6	Transcription regulation	Inhibition
Androgen receptor	SOX9	Transcription regulation	Activation
AKT2	ESR1 (nuclear)	Phosphorylation	Activation
Androgen receptor	AMD1	Transcription regulation	Activation
Coumestrol intracellular	ESR1 (nuclear)	Binding	Activation
Androgen receptor	CDC20	Transcription regulation	Activation
Cyclin D1	p21	Binding	Activation
E2F1	E2F1	Transcription regulation	Activation
ESR1 (nuclear)	PKHD1	Transcription regulation	Activation
Coumestrol + H(,2)O + ATP = PO(,4)('3-) + Coumestrol + ADP	PO(,4)('3-) cytoplasm	Technical	Technical
ESR1 (nuclear)	Tuftelin	Transcription regulation	Inhibition
ABCG2	H(,2)O + Rociletinib + ATP = PO(,4)('3-) + Rociletinib + ADP	Transport catalysis	Activation
Cyclin D1	CDK6	Binding	Activation
TCF8	ESR1 (nuclear)	Transcription regulation	Inhibition
ESR1 (nuclear)	PPIF	Transcription regulation	Activation
EGFR	AKT1	Phosphorylation	Activation
AKT(PKB)	GSK3 beta	Phosphorylation	Inhibition
H(,2)O intracellular	H(,2)O + Rociletinib + ATP = PO(,4)('3-) + Rociletinib + ADP	Technical	Technical
E2F1	ORC1L	Transcription regulation	Activation
RXRA	CYP26A1	Transcription regulation	Activation
Coumestrol intracellular	GSK3 beta	Binding	Inhibition
STAT3	CCRK	Transcription regulation	Activation
ESR1 (nuclear)	RPS21	Transcription regulation	Activation
CDK4	Rb protein	Phosphorylation	Inhibition
ESR1 (nuclear)	GABT	Transcription regulation	Activation
E2F1	CDK1 (p34)	Transcription regulation	Activation
RXRA	HNF1-beta	Transcription regulation	Activation
STAT3	AGP1 (ORM1)	Transcription regulation	Activation
TCF8	CDK4	Transcription regulation	Activation
CDK6	Rb protein	Phosphorylation	Inhibition
GSK3 beta	Cyclin D1	Phosphorylation	Inhibition
Tenascin-C	EGFR	receptor binding	Activation
Androgen receptor	STAT3	Binding	Activation
ESR1 (nuclear)	Tau (MAPT)	Transcription regulation	Activation
HNF1-beta	SREBP2 precursor	Transcription regulation	Activation
TCF8	Myosin VI	Transcription regulation	Inhibition
H(,2)O intracellular	Coumestrol + H(,2)O + ATP = PO(,4)('3-) + Coumestrol + ADP	Technical	Technical
AKT1	Androgen receptor	Phosphorylation	Inhibition
E2F1	Cyclin D1	Transcription regulation	Activation
E2F1	TSHZ1	Transcription regulation	Activation
SMAD3	ABCG2	Transcription regulation	Inhibition
p21	STAT3	Binding	Inhibition
ACK1	AKT1	Binding	Activation
BI-2536 + ATP + H(,2)O = BI-2536 + ADP + PO(,4)('3-)	BI-2536 extracellular region	Technical	Technical
SOX9	GSK3 beta	Binding	Activation
AKT(PKB)	SMAD3	Binding	Inhibition
CDK1 (p34)	AKT1	Phosphorylation	Activation
Androgen receptor	AGP1 (ORM1)	Transcription regulation	Activation
ESR1 (nuclear)	CYP2B6	Transcription regulation	Activation
ACK1	EGFR	Binding	Activation
RXRA	AGP1 (ORM1)	Transcription regulation	Activation
Androgen receptor	CDK4	Transcription regulation	Activation
AKT(PKB)	EGFR	Phosphorylation	Activation
ESR1 (nuclear)	TERT	Transcription regulation	Activation
p21	CDK4	Binding	Inhibition
Rociletinib intracellular	H(,2)O + Rociletinib + ATP = PO(,4)('3-) + Rociletinib + ADP	Technical	Technical
STAT3	TCF8	Transcription regulation	Activation
p21	Cyclin D1	Binding	Inhibition
STAT3	Beta-catenin	Transcription regulation	Activation
GSK3 beta	E2F1	Phosphorylation	Inhibition
H(,2)O + Rociletinib + ATP = PO(,4)('3-) + Rociletinib + ADP	ADP cytoplasm	Technical	Technical
ACK1	Androgen receptor	Phosphorylation	Activation
H(,2)O intracellular	BI-2536 + ATP + H(,2)O = BI-2536 + ADP + PO(,4)('3-)	Technical	Technical
Nek2A	CDC20	Phosphorylation	Inhibition
Coumestrol + H(,2)O + ATP = PO(,4)('3-) + Coumestrol + ADP	Coumestrol extracellular region	Technical	Technical
Rociletinib intracellular	ACK1	Binding	Inhibition
SOX9	Semaphorin 3A	Transcription regulation	Inhibition
Androgen receptor	GSK3 beta	Transcription regulation	Inhibition
GSK3 beta	Androgen receptor	Phosphorylation	Inhibition
p21	CDK6	Binding	Inhibition
AKT2	Beta-catenin	Binding	Activation
Androgen receptor	TCF8	Transcription regulation	Activation
Beta-catenin	SOX9	co-regulation of transcription	Activation
STAT3	CDK4	Transcription regulation	Activation
Androgen receptor	CDK1 (p34)	Transcription regulation	Activation
Androgen receptor	TERT	Transcription regulation	Inhibition
STAT3	CDK6	Transcription regulation	Activation
Rb protein	E2F1/DP1 complex	Binding	Inhibition
STAT3	5'-NTD	Transcription regulation	Activation
p21	ESR1 (nuclear)	Binding	Activation
H(,2)O + Rociletinib + ATP = PO(,4)('3-) + Rociletinib + ADP	PO(,4)('3-) cytoplasm	Technical	Technical
Beta-catenin	Androgen receptor	Binding	Activation
BI-2536 intracellular	Nek2A	Binding	Inhibition
KLF6	p21	Transcription regulation	Activation
ESR1 (nuclear)	C3orf26	Transcription regulation	Activation
EGFR	Beta-catenin	Phosphorylation	Inhibition
SOX9	Beta-catenin	Binding	Inhibition
STAT3	AKT1	Transcription regulation	Activation
E2F1	CDK4	Transcription regulation	Activation
ABCG2	Coumestrol + H(,2)O + ATP = PO(,4)('3-) + Coumestrol + ADP	Transport catalysis	Activation
HNF1-beta	LDHA	Transcription regulation	Activation
ATP cytoplasm	H(,2)O + Rociletinib + ATP = PO(,4)('3-) + Rociletinib + ADP	Technical	Technical
KLF6	E2F1	Transcription regulation	Inhibition
ESR1 (nuclear)	SOX9	Transcription regulation	Inhibition
GSK3 beta	ESR1 (nuclear)	Phosphorylation	Activation
E2F1	CDK6	Transcription regulation	Activation
BI-2536 intracellular	BI-2536 + ATP + H(,2)O = BI-2536 + ADP + PO(,4)('3-)	Technical	Technical
HNF1-beta	PKHD1	Transcription regulation	Activation
SMAD3	Tenascin-C	Transcription regulation	Activation
Cyclin D1	STAT3	Binding	Inhibition
E2F1/DP1 complex	CDK1 (p34)	Transcription regulation	Activation
Tcf(Lef)	Tenascin-C	Transcription regulation	Activation
Cyclin D1	Androgen receptor	Binding	Inhibition
SMAD3	TERT	Transcription regulation	Inhibition
Tcf(Lef)	Androgen receptor	Transcription regulation	Activation
STAT3	LDHA	Transcription regulation	Activation
ESR1 (nuclear)	D53	Transcription regulation	Activation
Beta-catenin	TCF8	co-regulation of transcription	Activation
SMAD3	SLC25A5	Transcription regulation	Inhibition
RXRA	EGFR	Transcription regulation	Inhibition
STAT3	SMAD3	Transcription regulation	Inhibition
Beta-catenin	AKT2	co-regulation of transcription	Activation
STAT3	p21	Transcription regulation	Activation
ESR1 (nuclear)	FLJ20366	Transcription regulation	Activation
Coumestrol intracellular	AKT1	Binding	Inhibition
SOX9	HNF1-beta	Transcription regulation	Inhibition
CDK6	Beta-catenin	Phosphorylation	Inhibition
RXRA	CD36	Transcription regulation	Activation
Rb protein	Androgen receptor	Binding	Activation
AKT(PKB)	ESR1 (nuclear)	Phosphorylation	Activation
ESR1 (nuclear)	GSK3 beta	Transcription regulation	Activation
AKT1	Beta-catenin	Binding	Inhibition
STAT3	STAT3	Binding	Activation
ESR1 (nuclear)	SLC38A2	Transcription regulation	Activation
CDK1 (p34)	Androgen receptor	Phosphorylation	Activation
CDC20	p21	Binding	Inhibition
SMAD3	5'-NTD	Transcription regulation	Activation
Nek2A	Beta-catenin	Phosphorylation	Activation
AKT2	p21	Binding	Activation
EGFR	STAT3	Phosphorylation	Activation
ESR1 (nuclear)	ABCG2	Transcription regulation	Activation
Cyclin D1	ESR1 (nuclear)	Binding	Activation
SOX9	ABCG2	Transcription regulation	Activation
EGFR	ESR1 (nuclear)	Phosphorylation	Activation
TCF8	Androgen receptor	Transcription regulation	Activation
HNF1-beta	SERPINA6	Transcription regulation	Activation
Beta-catenin	STAT3	co-regulation of transcription	Activation
E2F1	ACKR3	Transcription regulation	Inhibition
ESR1 (nuclear)	AKT2	Transcription regulation	Activation
ESR1 (nuclear)	AACS	Transcription regulation	Inhibition
Androgen receptor	CCRK	Transcription regulation	Activation
BI-2536 extracellular region	EGFR	Binding	Inhibition
Rb protein	STAT3	Binding	Inhibition
Coumestrol intracellular	ACK1	Binding	Inhibition
AKT(PKB)	Androgen receptor	Phosphorylation	Inhibition
ABCG2	BI-2536 + ATP + H(,2)O = BI-2536 + ADP + PO(,4)('3-)	Transport catalysis	Activation
SOX9	VNN1	Transcription regulation	Activation
GSK3 beta	STAT3	Binding	Activation
ESR1 (nuclear)	E2F1	Transcription regulation	Activation
Androgen receptor	Cyclin D1	Transcription regulation	Inhibition
EGFR	Cyclin D1	Transcription regulation	Activation
GSK3 beta	KLF6	Phosphorylation	Activation
AKT1	GSK3 beta	Phosphorylation	Inhibition
EGFR	E2F1	Binding	Activation
p21	CDK1 (p34)	Binding	Inhibition
Tcf(Lef)	Cyclin D1	Transcription regulation	Activation
STAT3	SOX9	Transcription regulation	Activation
ESR1 (nuclear)	ACOX2	Transcription regulation	Activation
T3Rbeta/RXR-alpha	SREBP2 precursor	Transcription regulation	Activation
STAT3	ESR1 (nuclear)	Binding	Activation
ESR1 (nuclear)	ACKR3	Transcription regulation	Inhibition
STAT3	GSK3 beta	Transcription regulation	Inhibition
AKT1	p21	Phosphorylation	Activation
ACK1	AKT(PKB)	Phosphorylation	Activation
E2F1	ABCG2	Transcription regulation	Activation
EGFR	EGFR	Phosphorylation	Activation
GSK3 beta	p21	Phosphorylation	Inhibition
Androgen receptor	ACKR3	Transcription regulation	Inhibition
ESR1 (nuclear)	STAT3	Transcription regulation	Activation
E2F1	TERT	Transcription regulation	Activation
E2F1	Androgen receptor	Transcription regulation	Inhibition
E2F1	Nek2A	Transcription regulation	Activation
Androgen receptor	p21	Transcription regulation	Activation
SMAD3	CDK4	Transcription regulation	Activation
AKT(PKB)	Beta-catenin	Phosphorylation	Activation
SOX9	SOX9	Transcription regulation	Activation
Coumestrol intracellular	CDK1 (p34)	Binding	Inhibition
Rb protein	E2F1	Binding	Inhibition
Cyclin D1	CDK4	Binding	Activation
GSK3 beta	SMAD3	Phosphorylation	Inhibition
SMAD3	Beta-catenin	Binding	Activation
Rb protein	TCF8	co-regulation of transcription	Inhibition
SMAD3	p21	Transcription regulation	Activation
ATP cytoplasm	BI-2536 + ATP + H(,2)O = BI-2536 + ADP + PO(,4)('3-)	Technical	Technical
SMAD3	SOX9	Binding	Activation
E2F1	EGFR	Transcription regulation	Activation
ESR1 (nuclear)	Cyclin D1	co-regulation of transcription	Activation
SREBP2 precursor	AACS	Transcription regulation	Activation
TCF8	SREBP2 precursor	Transcription regulation	Inhibition
Androgen receptor	EGFR	Binding	Inhibition
E2F1	Rb protein	Transcription regulation	Activation
Rociletinib extracellular region	EGFR	Covalent modification	Inhibition
EGFR	ABCG2	co-regulation of transcription	Activation
BI-2536 + ATP + H(,2)O = BI-2536 + ADP + PO(,4)('3-)	ADP cytoplasm	Technical	Technical
Coumestrol intracellular	AKT3	Binding	Inhibition
SOX9	RXRA	Transcription regulation	Activation
RXRA	Nek2A	Transcription regulation	Activation
SOX9	KLF6	Transcription regulation	Activation
Beta-catenin	Cyclin D1	co-regulation of transcription	Activation
STAT3	Androgen receptor	Binding	Activation
E2F1	TCF8	Transcription regulation	Activation
SMAD3	TMEFF1	Transcription regulation	Activation
p21	TCF8	Binding	Inhibition
CDK6	Androgen receptor	Binding	Activation
Androgen receptor	Beta-catenin	Binding	Activation
ESR1 (nuclear)	NEDD4L	Transcription regulation	Inhibition
CDK4	p21	Binding	Inhibition
CDK1 (p34)	Rb protein	Phosphorylation	Inhibition
BI-2536 + ATP + H(,2)O = BI-2536 + ADP + PO(,4)('3-)	PO(,4)('3-) cytoplasm	Technical	Technical
Tcf(Lef)	AKT1	Transcription regulation	Activation
Coumestrol intracellular	AKT2	Binding	Inhibition
CDK1 (p34)	CDC20	Phosphorylation	Activation
Androgen receptor	LDHA	Transcription regulation	Activation
ESR1 (nuclear)	ESR1 (nuclear)	Transcription regulation	Activation
GSK3 beta	Beta-catenin	Phosphorylation	Inhibition
STAT3	EGFR	Transcription regulation	Inhibition
Androgen receptor	AKT1	Transcription regulation	Activation
Coumestrol + H(,2)O + ATP = PO(,4)('3-) + Coumestrol + ADP	ADP cytoplasm	Technical	Technical
CDK1 (p34)	STAT3	Phosphorylation	Inhibition
KLF6	Cyclin D1	Binding	Inhibition
RXRA	GSK3 beta	Binding	Inhibition
ESR1 (nuclear)	LDHA	Transcription regulation	Activation
RXRA	CYP2B6	Transcription regulation	Activation
Beta-catenin	AKT1	co-regulation of transcription	Activation
E2F1	Beta-catenin	Transcription regulation	Inhibition
p21	E2F1	Binding	Inhibition
									Transcription factor
									Enzymes
									Transporter
									Generic binding protein
									Receptor ligand
									Protein
									Generic channel
